# Supplementary material for: Improving the Efficacy of the Data Entry Process for Clinical Research With a Natural Language Processing–Driven Medical Information Extraction System: Quantitative Field Research
Source: PubMed Central journal article supplement (PMC6672807; doi:10.2196/13331), 2019-07-16
Supplement: medinform_v7i3e13331_app1.pdf [file medinform_v7i3e13331_app1.pdf]

**Appendix** Table 1. Inter-operator agreement and consumed time for each eCRF topic.

| eCRF topic                      | Data element type | Average consumed time (Median, IQR, unit: second) | Data element name (Chinese) | Data element name (English)              | Consistence rate <sup>a</sup> (unit: %) |
|---------------------------------|-------------------|---------------------------------------------------|-----------------------------|------------------------------------------|-----------------------------------------|
| <b>Congenital heart disease</b> | True-false I      | 23.32 (20.57, 26.70)                              | 意识障碍                        | Disturbance of consciousness             | 98 (59/60)                              |
|                                 |                   |                                                   | 生长发育迟缓                      | Growth retardation                       | 98 (59/60)                              |
|                                 |                   |                                                   | 营养异常                        | Undernutrition                           | 98 (59/60)                              |
|                                 |                   |                                                   | 呼吸音异常                       | Abnormal breath sounds                   | 98 (59/60)                              |
|                                 |                   |                                                   | 收缩期杂音                       | Systolic murmur                          | 100 (60/60)                             |
|                                 |                   |                                                   | 舒张期杂音                       | Diastolic murmur                         | 97 (58/60)                              |
|                                 | Choice            | 9.53 (7.58, 10.48)                                | 主诉                          | Chief complaint                          | 88 (53/60)                              |
|                                 |                   |                                                   | 疾病诊断                        | Diagnosis                                | 92 (55/60)                              |
|                                 | True-false II     | 39.64 (37.08, 42.09)                              | 右室扩大                        | Right ventricular enlargement            | 90 (54/60)                              |
|                                 |                   |                                                   | 右房扩大                        | Right atrial enlargement                 | 93 (56/60)                              |
|                                 |                   |                                                   | 左室扩大                        | Left ventricular enlargement             | 97 (58/60)                              |
|                                 |                   |                                                   | 左房扩大                        | Left atrial enlargement                  | 98 (59/60)                              |
|                                 |                   |                                                   | 左室壁运动异常                     | Left ventricular wall motion abnormality | 97 (58/60)                              |

---

|                   |                      |         |                                          |             |
|-------------------|----------------------|---------|------------------------------------------|-------------|
|                   |                      | 主动脉增宽   | Dilated aorta                            | 98 (59/60)  |
|                   |                      | 肺动脉增宽   | Dilated pulmonary artery                 | 100 (60/60) |
|                   |                      | 二尖瓣增厚   | Mitral valve thickening                  | 100 (60/60) |
|                   |                      | 二尖瓣反流   | Mitral regurgitation                     | 100 (60/60) |
|                   |                      | 室间隔缺损   | Ventricular septal defect                | 97 (58/60)  |
|                   |                      | 房间隔缺损   | Atrial septal defect                     | 98 (59/60)  |
|                   |                      | 卵圆孔未闭   | Patent foramen ovale                     | 93 (56/60)  |
|                   |                      | 主动脉瓣反流  | Aortic regurgitation                     | 97 (58/60)  |
|                   |                      | 三尖瓣反流   | Tricuspid regurgitation                  | 97 (58/60)  |
|                   |                      | 动脉导管未闭  | Patent ductus arteriosus                 | 98 (59/60)  |
| Fill-in-the-blank | 12.87 (11.97, 15.30) | 二尖瓣反流束宽 | Beam width of mitral regurgitation       | 98 (59/60)  |
|                   |                      | 房间隔缺损大小 | Lesion size of atrial septal defect      | 95 (57/60)  |
|                   |                      | 室间隔缺损大小 | Lesion size of ventricular septal defect | 98 (59/60)  |
|                   |                      | 卵圆孔未闭大小 | Lesion size of patent foramen ovale      | 98 (59/60)  |

---

|                  |               |                      |        |                                     |               |
|------------------|---------------|----------------------|--------|-------------------------------------|---------------|
|                  |               |                      | 动脉导管内径 | Diameter of ductus arteriosus       | 98 (59/60)    |
|                  | Overall       | 88.69 (82.13, 98.01) | /      | /                                   | 97(1627/1680) |
| <b>Pneumonia</b> | True-false I  | 21.03 (19.03, 24.65) | 意识障碍   | Disturbance of consciousness        | 97 (58/60)    |
|                  |               |                      | 生长发育迟缓 | Growth retardation                  | 95 (57/60)    |
|                  |               |                      | 营养异常   | Undernutrition                      | 92 (55/60)    |
|                  |               |                      | 呼吸音异常  | Abnormal breath sounds              | 92 (55/60)    |
|                  |               |                      | 呼吸困难   | Dyspnea                             | 97 (58/60)    |
|                  | Choice        | 7.51 (6.67, 8.27)    | 主诉     | Chief complaint                     | 90 (54/60)    |
|                  |               |                      | 疾病诊断   | Diagnosis                           | 92 (55/60)    |
|                  | True-false II | 20.85 (18.87, 23.43) | 纵膈移位   | Mediastinal displacement            | 98 (59/60)    |
|                  |               |                      | 纵膈增宽   | Widened mediastinum                 | 93 (56/60)    |
|                  |               |                      | 气管位移   | Trachea displacement                | 93 (56/60)    |
|                  |               |                      | 心影异常   | Heart shadow abnormal               | 92 (55/60)    |
|                  |               |                      | 两膈欠光整  | Coarse septum transversum           | 98 (59/60)    |
|                  |               |                      | 肺纹理增多  | Increased vascular markings of lung | 98 (59/60)    |
|                  |               |                      | 肺纹理增粗  | Coarse vascular markings of lung    | 98 (59/60)    |

---

|         |                        |                                      |               |
|---------|------------------------|--------------------------------------|---------------|
|         | 肺纹理模糊                  | Indistinct vascular markings of lung | 95 (57/60)    |
|         | 肋膈角变钝                  | Obliteration of costophrenic angle   | 95 (57/60)    |
|         | 渗出影                    | Exudate lesion                       | 97 (58/60)    |
|         | 肺野模糊影                  | Opacity lesion of lung field         | 95 (57/61)    |
|         | 肺野片状影                  | Patchy lesion of lung field          | 95 (57/60)    |
| Overall | 50.86 (48.23, / 52.96) | /                                    | 95(1081/1140) |

---

<sup>a</sup> Consistence rate: the number of data elements in which the two researchers did not have complete agreement divided by the total number of data elements.
